# Supplementary material for: Development and validation of a simulation method, PeCHREM, for evaluating spatio-temporal concentration changes of paddy herbicides in rivers
Source: Royal Society of Chemistry journal article supplement (doi:10.1039/c7em00517b), 2018-01-01
Supplement: c7em00517b1.pdf [file c7em00517b1.pdf]

## **Development and validation of a simulation method, PeCHREM, for evaluating spatio-temporal concentration changes of paddy herbicides in rivers**

Y. Imaizumi,<sup>\*a</sup> N. Suzuki,<sup>a</sup> F. Shiraishi,<sup>a</sup> D. Nakajima,<sup>a</sup> S. Serizawa,<sup>a</sup> T. Sakurai<sup>a</sup> and H. Shiraishi<sup>a</sup>

a. National Institute for Environmental Studies, 16-2 Onogawa, Tsukuba, Ibaraki, Japan.

\* Corresponding author. E-mail: [imaizumi@nies.go.jp](mailto:imaizumi@nies.go.jp); Tel: +81 (0)29 850 2689

**Electronic Supplementary Information**

## 1. Application records of pesticide formulations

The application records submitted by farmers, written in Japanese, were previously published on webpages of Agricultural Cooperatives. However, these websites no longer publish the application records. Therefore, we provide one example record here. Names of materials including pesticides were Japanese

### FY2007 Application record about paddy fields

Name: xxx      Address: xxx

Breed of rice plants: xxx      Area of paddy fields: 145 are

Date of seeding: 19 May      Date of transplanting: 17, 18 June

Date of heading: 12 Aug.      Date of harvesting: 18, 19 Sep.

| Item                            | Material (pesticide)                                     | Use date          | Concentration, amount, or dilution rate |
|---------------------------------|----------------------------------------------------------|-------------------|-----------------------------------------|
| Seed disinfection               | Sumichion emulsion                                       | 12 May            | 1000 times                              |
|                                 | Tekuri-do flowable                                       | 12 May            | 200 times                               |
| Soil disinfection for seedbeds  | Dakore-to wettable powder                                | 19 May            | 500 ml/box                              |
| Pesticides for nursery box      | Bi-mu Adomaiya- Supino box granule                       | 16 June           | 50 g/box                                |
| Soil improvement materials      | Toretaro                                                 | 25 May            | 40 kg/10 a                              |
| Basal fertilizer                | Kyu-kyokunoippatsu                                       | 10 June           | 45 kg/10 a                              |
| Additional fertilizer           | -                                                        |                   |                                         |
| Herbicides (initial stage)      | Teraga-do granule                                        | 17 June           | 1 kg/10 a                               |
| Herbicides (late stage)         | Kurinntyas-basu ME liquid                                | 30 July           | 1000 ml/10 a                            |
| Core pest control               | -                                                        |                   |                                         |
| Additional pest control         | -                                                        |                   |                                         |
| Pest control using a helicopter | Yoshitake union of helicopter pest control <sup>a)</sup> | 5 Aug.<br>21 Aug. |                                         |

a) A name of union applying pesticide formulations by helicopter.

## 2. Values used for other PADDY model parameters

We used following values from the literature<sup>1</sup>.

| <b>Parameter</b>                                                         | <b>Value</b> |
|--------------------------------------------------------------------------|--------------|
| Area (m <sup>2</sup> )                                                   | 828          |
| Depth of water in the field (m)                                          | 0.032        |
| Depth of surface soil (m)                                                | 0.005        |
| Thickness of each sub-surface layer (m)                                  | 0.005        |
| Water volume (m <sup>3</sup> )                                           |              |
| Field water                                                              | 26.5         |
| Pore water in each sub-surface layer <sup>a)</sup> (0–2 cm)              | 2.3          |
| Pore water in each sub-surface layer <sup>a)</sup> (2–4 cm)              | 1.9          |
| Weight of soil (kg)                                                      |              |
| Surface soil                                                             | 2500         |
| Sub-surface soil in each layer <sup>a)</sup> (0.5–2 cm)                  | 2500         |
| Sub-surface soil in each layer <sup>a)</sup> (2–4 cm)                    | 2900         |
| Runoff rate of water (m <sup>3</sup> day <sup>-1</sup> )                 | 14.7         |
| Penetration rate (to >4 cm) of water (m <sup>3</sup> day <sup>-1</sup> ) | 7.9          |

a) Value of each 0.005-m-thick sub-surface layer.

### 3. Explanation of equation 4

Equation 4 was derived from empirical equations published in a report written in Japanese<sup>2</sup>. Here, we summarize the results and related data, mostly from that report but partly from another report<sup>3</sup>, below. The author investigated runoff percentages, measured with lysimeters, of 21 pesticides from a paddy. They found a significant relationship between runoff percentages and the water solubility of the pesticides ( $r = 0.872$ ,  $n = 20$ ; one pesticide, ethofenprox, was not used because its water solubility is unknown). Furthermore, he showed that the runoff percentages of pesticides measured with lysimeters and the runoff percentages from actual paddy fields to rivers, measured in the field, were also related significantly ( $r = 0.870$ ,  $n = 8$ ). These relationships are described by equations S1 and S2.

$$\text{Log}_{10}(Y_1) = 0.531 + 0.327 \text{Log}_{10}(X) \quad \text{S1}$$

$$\text{Log}_{10}(Y_R) = -0.546 + 0.874 \text{Log}_{10}(Y_1) \quad \text{S2}$$

where  $Y_1$  denotes the average runoff percentage measured with lysimeters,  $X$  denotes the water solubility of a pesticide, and  $Y_R$  denotes the runoff percentage from actual paddy fields measured in Chiba Prefecture. The original data are listed in Table S1. From equations S1 and S2 we derived equation 4 as follows, by assuming that water solubility of pesticides expressed as ppm is equivalent to that expressed as  $\text{mg L}^{-1}$ .

$$\text{Log}_{10}(Y_R) = -0.546 + 0.874 \{0.531 + 0.327 \text{Log}_{10}(X)\} \quad \text{S3}$$

$$\text{Log}_{10}(Y_R) = -0.0819 + 0.286 \text{Log}_{10}(X) \quad \text{S4}$$

Table S1 Runoff percentages used for deriving equation 4.

| Pesticide                          | Solubility <sup>2</sup><br>(ppm) | Runoff percentages<br>measured with<br>lysimeters <sup>2</sup> (%) | Runoff percentages<br>from actual paddy<br>fields <sup>3</sup> (%) | Target herbicide in<br>this article? |
|------------------------------------|----------------------------------|--------------------------------------------------------------------|--------------------------------------------------------------------|--------------------------------------|
| Chlornitrofen                      | 0.25                             | 1.58                                                               | 0.109                                                              |                                      |
| Dymron (Daimuron)                  | 1.7                              | 16.7                                                               | 3.01                                                               | Yes                                  |
| Chlomethoxyfen<br>(Chlomethoxynil) | 0.3                              | 2.03                                                               | 1.49                                                               |                                      |
| Bifenox                            | 0.35                             | 1.75                                                               |                                                                    |                                      |
| Butachlor                          | 23                               | 6.29                                                               | 2.32                                                               | Yes                                  |
| Pyrazolate                         | 0.05                             | 0.96                                                               | 0.31                                                               | Yes                                  |
| Bensulfuron methyl                 | 12-120                           | 23.0                                                               |                                                                    | Yes                                  |
| Dimepiperate                       | 20                               | 12.3                                                               |                                                                    |                                      |
| Mefenacet                          | 4                                | 9.10                                                               |                                                                    | Yes                                  |
| Symetryn                           | 450                              | 44.4                                                               | 5.65                                                               | Yes                                  |
| Molinate                           | 900                              | 24.7                                                               | 5.96                                                               |                                      |
| Thiobencarb                        | 30                               | 7.07                                                               | 1.44                                                               |                                      |
| Cycloprothrin                      | 0.091                            | 1.68                                                               |                                                                    |                                      |
| Fenthion                           | 2                                | 2.17                                                               |                                                                    |                                      |
| Fenitrothion                       | 14                               | 3.14                                                               |                                                                    |                                      |
| Fenobucarb                         | 660                              | 17.1                                                               |                                                                    |                                      |

|                |      |      |
|----------------|------|------|
| Propoxur       | 2000 | 50.9 |
| Isoprothiolane | 50   | 22.0 |
| Tricyclazole   | 700  | 13.8 |
| Mepronil       | 12.7 | 13.0 |

#### 4. Sources of physico-chemical data

We collected physico-chemical data from “reliable” sources consisting of lists of pesticides and their properties. Because the aim of our research was to develop a model that would be applicable to many paddy herbicides and to validate the reliability of the model, it is important to use a dataset that has been used for actual decision-making. Reference 4, “Noyaku Handobukku” (Agricultural Chemical Handbook), was compiled by the Japan Plant Protection Association, which collected the physico-chemical properties of pesticides from the pesticide manufacturers. This handbook is also used as a reliable data source for risk assessment under the Japanese Agricultural Chemicals Regulation Law. Reference 6, Risk Assessment Reports of Pesticides, was published by the Food Safety Commission of Japan, which performs risk assessments and publishes an assessment report for all pesticides that affect human foods. These risk assessments are published in Japanese, but some include summaries in English ([http://www.fsc.go.jp/english/evaluationreports/agrichemicals\\_e1.html](http://www.fsc.go.jp/english/evaluationreports/agrichemicals_e1.html)). Reference 7, “Noyaku no Kankyotokusei to Dokuseidetashu” (Data on environmental properties and toxicities of pesticides) has been used as a reliable source for the Initial Environmental Risk Assessment of Chemicals, which was carried out by the Japanese Ministry of the Environment. This document is also in Japanese, but summaries of some results are available in English ([https://www.env.go.jp/en/chemi/chemicals/profile\\_erac/index.html](https://www.env.go.jp/en/chemi/chemicals/profile_erac/index.html)). We believe, therefore, that these data sources are considered reliable for use in Japanese decision-making.

5. Supplemental tables and figure

Table S2 Chemical properties of the target herbicides.

| Name                    | MW    | Solubility<br>(mg L <sup>-1</sup> ) | Vapor pressure<br>(Pa)    | K <sub>oc</sub> <sup>a)</sup><br>(L kg <sup>-1</sup> ) | K <sub>ow</sub> <sup>b)</sup> | Degradation<br>rate in water<br>(day <sup>-1</sup> ) | Degradation<br>rate in<br>sediment<br>(day <sup>-1</sup> ) |
|-------------------------|-------|-------------------------------------|---------------------------|--------------------------------------------------------|-------------------------------|------------------------------------------------------|------------------------------------------------------------|
| Azimsulfuron            | 424.4 | 47.6 <sup>c)</sup>                  | 4.0 × 10 <sup>-9</sup> d) | 278 <sup>c)</sup> *                                    | 0.043 <sup>c)</sup>           | 0.13 <sup>e)</sup> *‡                                | 0.13 <sup>e)</sup> *‡                                      |
| Bensulfuron<br>methyl   | 410.4 | 6.65 <sup>c)</sup>                  | 2.8 × 10 <sup>-9</sup> d) | 2278 <sup>c)</sup> *                                   | 6.2 <sup>c)</sup>             | 0.014 <sup>f)</sup> *                                | 0.017 <sup>f)</sup> *                                      |
| Bentazon                | 240.3 | 570 <sup>c)</sup>                   | 1.7 × 10 <sup>-4</sup> c) | 20 <sup>c)</sup> *                                     | 31 <sup>c)</sup>              | 0.33 <sup>c)</sup>                                   | 0.035 <sup>f)</sup>                                        |
| Benzobicyclon           | 447.0 | 0.052 <sup>c)</sup>                 | 5.6 × 10 <sup>-5</sup> c) | 10000 <sup>c)</sup>                                    | 1260 <sup>c)</sup>            | 0.97 <sup>e)</sup> *                                 | 0.17 <sup>e)</sup> *                                       |
| Benzofenap              | 431.3 | 0.12 <sup>c)</sup>                  | 3.2 × 10 <sup>-6</sup> c) | 2113 <sup>f)</sup>                                     | 49000 <sup>c)</sup>           | 0.018 <sup>f)</sup> ‡                                | 0.018 <sup>f)</sup>                                        |
| Bromobutide             | 312.3 | 3.54 <sup>c)</sup>                  | 5.9 × 10 <sup>-5</sup> c) | 223 <sup>c)</sup> *                                    | 2880 <sup>c)</sup>            | 0.019 <sup>e)</sup> *†                               | 0.019 <sup>e)</sup> *†                                     |
| Butachlor               | 311.9 | 16 <sup>c)</sup>                    | 2.5 × 10 <sup>-4</sup> c) | 740 <sup>f)</sup>                                      | 26300 <sup>c)</sup>           | 0.28 <sup>f)</sup> *                                 | 0.013 <sup>f)</sup> *                                      |
| Butamifos               | 332.4 | 6.19 <sup>c)</sup>                  | 5.1 × 10 <sup>-5</sup> c) | 2085 <sup>c)</sup> *                                   | 41700 <sup>c)</sup>           | 0.0062 <sup>f)</sup> *‡                              | 0.0062 <sup>f)</sup> *                                     |
| Cafenstrole             | 350.4 | 2.5 <sup>c)</sup>                   | 5.3 × 10 <sup>-5</sup> c) | 1641 <sup>e)</sup> *                                   | 1620 <sup>c)</sup>            | 0.050 <sup>e)</sup> †                                | 0.050 <sup>e)</sup> †                                      |
| Clomeprop               | 324.2 | 0.035 <sup>c)</sup>                 | 4.3 × 10 <sup>-5</sup> c) | 3483 <sup>f)</sup>                                     | 63100 <sup>c)</sup>           | 0.28 <sup>e)</sup> *‡                                | 0.28 <sup>e)</sup> *                                       |
| Cumyluron               | 302.8 | 0.879 <sup>c)</sup>                 | 8.0 × 10 <sup>-5</sup> c) | 852 <sup>c)</sup>                                      | 407 <sup>c)</sup>             | 0.0082 <sup>e)</sup> *†                              | 0.0082 <sup>e)</sup> *†                                    |
| Cyclosulfamuron         | 421.4 | 0.34 <sup>c)</sup>                  | 2.2 × 10 <sup>-5</sup> c) | 996 <sup>c)</sup> *                                    | 38 <sup>c)</sup>              | 0.41 <sup>d)</sup> †                                 | 0.41 <sup>d)</sup> †                                       |
| Daimuron                | 268.4 | 0.79 <sup>c)</sup>                  | 4.5 × 10 <sup>-7</sup> c) | 847 <sup>f)</sup>                                      | 501 <sup>c)</sup>             | 0.014 <sup>f)</sup> ‡                                | 0.014 <sup>f)</sup>                                        |
| Dimethametryn           | 255.4 | 20.2 <sup>c)</sup>                  | 1.1 × 10 <sup>-4</sup> c) | 254 <sup>f)</sup>                                      | 1580 <sup>c)</sup>            | 0.025 <sup>f)</sup>                                  | 0.0050 <sup>f)</sup>                                       |
| Esprocarb               | 265.4 | 4.92 <sup>c)</sup>                  | 1.0 × 10 <sup>-2</sup> c) | 2800 <sup>e)</sup> *                                   | 41700 <sup>c)</sup>           | 0.018 <sup>e)</sup> *†                               | 0.018 <sup>e)</sup> *†                                     |
| Halosulfuron<br>methyl  | 434.8 | 10.2 <sup>c)</sup>                  | 1.3 × 10 <sup>-5</sup> c) | 89 <sup>c)</sup> *                                     | 6.7 <sup>c)</sup> *           | 0.35 <sup>e)</sup> †                                 | 0.35 <sup>e)</sup> †                                       |
| Imazosulfuron           | 412.8 | 155.6 <sup>c)</sup>                 | 6.3 × 10 <sup>-4</sup> c) | 133 <sup>f)</sup>                                      | 39 <sup>c)</sup>              | 0.026 <sup>d)</sup> †                                | 0.026 <sup>d)</sup> †                                      |
| MCPA                    | 200.6 | 825 <sup>c)</sup>                   | 2.3 × 10 <sup>-4</sup> c) | 98 <sup>f)</sup>                                       | 0.87 <sup>d)</sup> *          | 0.070 <sup>f)</sup> *                                | 0.099 <sup>f)</sup>                                        |
| Mefenacet               | 298.4 | 5 <sup>c)</sup>                     | 4.5 × 10 <sup>-7</sup> c) | 893 <sup>c)</sup> *                                    | 1700 <sup>c)</sup>            | 0.0097 <sup>f)</sup> *‡                              | 0.0097 <sup>f)</sup> *                                     |
| Oxaziclomefone          | 376.3 | 0.15 <sup>c)</sup>                  | 1.6 × 10 <sup>-8</sup> c) | 10000 <sup>c)</sup>                                    | 5010 <sup>c)</sup>            | 0.49 <sup>d)</sup> *†                                | 0.49 <sup>e)</sup> *†                                      |
| Pretilachlor            | 311.9 | 74 <sup>c)</sup>                    | 6.5 × 10 <sup>-4</sup> c) | 1146 <sup>c)</sup> *                                   | 7940 <sup>c)</sup>            | 0.036 <sup>e)</sup> †                                | 0.036 <sup>e)</sup> †                                      |
| Pyrazolate              | 439.3 | 0.056 <sup>c)</sup>                 | 1.3 × 10 <sup>-5</sup> c) | 2855 <sup>f)</sup>                                     | 380 <sup>c)</sup>             | 0.049 <sup>f)</sup> *‡                               | 0.049 <sup>f)</sup> *                                      |
| Pyrazosulfuron<br>ethyl | 414.4 | 9.67 <sup>c)</sup>                  | 4.2 × 10 <sup>-8</sup> c) | 209 <sup>f)</sup>                                      | 1450 <sup>c)</sup>            | 0.15 <sup>f)</sup> *‡                                | 0.15 <sup>f)</sup> *                                       |
| Pyriftalid              | 318.4 | 1.8 <sup>c)</sup>                   | 2.2 × 10 <sup>-8</sup> c) | 812 <sup>c)</sup> *                                    | 398 <sup>c)</sup>             | 0.11 <sup>e)</sup> *‡                                | 0.11 <sup>e)</sup> *                                       |
| Simetryn                | 213.3 | 428 <sup>c)</sup>                   | 5.0 × 10 <sup>-5</sup> c) | 8743 <sup>c)</sup>                                     | 138 <sup>c)</sup>             | 0.0072 <sup>f)</sup> *‡                              | 0.0072 <sup>f)</sup> *                                     |

a) Soil organic carbon–water partition coefficient.

b) Octanol–water partition coefficient. c) Reference 4, d) Reference 5, e) Reference 6, f) Reference 7. If values of a property were obtained from several references, the value from the reference with the lowest number was used.

\* Geometric average of multiple values.

† The half-life in aerobic soil was used.

‡ The degradation rate in sediment was used.

Table S3 LC/MS/MS conditions for the target herbicides.

| Name                 | CAS RN®     | ESI <sup>a)</sup> (positive or negative) | SRM <sup>b)</sup> ion ( <i>m/z</i> ) | Collision energy (eV) |
|----------------------|-------------|------------------------------------------|--------------------------------------|-----------------------|
| Azimsulfuron         | 120162-55-2 | positive                                 | 425 > 139                            | 45                    |
| Bensulfuron methyl   | 83055-99-6  | positive                                 | 411 > 182                            | 17                    |
| Bentazon             | 25057-89-0  | negative                                 | 239 > 197                            | 13                    |
| Benzobicyclon        | 156963-66-5 | positive                                 | 447 > 229                            | 41                    |
| Benzofenap           | 82692-44-2  | positive                                 | 431 > 119                            | 17                    |
| Bromobutide          | 74712-19-9  | positive                                 | 312 > 194                            | 13                    |
| Butachlor            | 23184-66-9  | positive                                 | 312 > 238                            | 17                    |
| Butamifos            | 36335-67-8  | positive                                 | 333 > 152                            | 13                    |
| Cafenstrole          | 125306-83-4 | positive                                 | 351 > 72                             | 25                    |
| Clomeprop            | 84496-56-0  | positive                                 | 324 > 203                            | 9                     |
| Cumyluron            | 99485-76-4  | positive                                 | 303 > 125                            | 41                    |
| Cyclosulfamuron      | 136849-15-5 | positive                                 | 422 > 218                            | 25                    |
| Daimuron             | 22936-75-0  | positive                                 | 269 > 91                             | 45                    |
| Dimethametryn        | 42609-52-9  | positive                                 | 256 > 96                             | 29                    |
| Esprocarb            | 85785-20-2  | positive                                 | 266 > 91                             | 17                    |
| Halosulfuron methyl  | 100784-20-1 | negative                                 | 433 > 154                            | 29                    |
| Imazosulfuron        | 122548-33-8 | positive                                 | 413 > 156                            | 13                    |
| MCPA                 | 94-74-6     | negative                                 | 199 > 141                            | 9                     |
| Mefenacet            | 73250-68-7  | positive                                 | 299 > 120                            | 25                    |
| Oxaziclomefone       | 153197-14-9 | positive                                 | 376 > 190                            | 9                     |
| Pretilachlor         | 51218-49-6  | positive                                 | 312 > 132                            | 49                    |
| Pyrazolate           | 58011-68-0  | positive                                 | 439 > 173                            | 13                    |
| Pyrazosulfuron ethyl | 93697-74-6  | positive                                 | 415 > 83                             | 55                    |
| Pyriftalid           | 135186-78-6 | positive                                 | 319 > 179                            | 29                    |
| Simetryn             | 1014-70-6   | positive                                 | 214 > 124                            | 17                    |

a) Electrospray ionization. b) Selected Reaction Monitoring.

Table S4 Sampling site information.

| River name             | Prefecture | Latitude       | Longitude       | Basin area <sup>a)</sup><br>(km <sup>2</sup> ) |
|------------------------|------------|----------------|-----------------|------------------------------------------------|
| Yoshida                | Miyagi     | N 38°26' 40' ' | E 141°01' 32' ' | 348.5                                          |
| Usui                   | Gunma      | N 36°19' 58' ' | E 138°57' 15' ' | 284.6                                          |
| Kokai                  | Tochigi    | N 36°25' 33' ' | E 140°03' 32' ' | 167.9                                          |
| Koise                  | Ibaraki    | N 36°11' 03' ' | E 140°15' 35' ' | 153.1                                          |
| Hanamuro <sup>b)</sup> | Ibaraki    | N 36°07' 19' ' | E 140°06' 01' ' | 31.9                                           |
|                        |            | N 36°05' 32' ' | E 140°07' 23' ' |                                                |
| Asahina                | Shizuoka   | N 34°53' 24' ' | E 138°18' 01' ' | 98.8                                           |
| Koutsuki               | Kagoshima  | N 31°38' 30' ' | E 130°30' 52' ' | 63.4                                           |

a) Basin areas were calculated from the basin segment area information included in the G-CIEMS model.<sup>8</sup>

b) The Hanamuro River was sampled at an upstream (upper row) and a downstream (lower row) site.

Table S5 Categorization of herbicide formulations based on Property A (the first day of the suggested usage period after transplanting) and calculated properties of each category.

| Category | Property A                       | Average relative date of<br>herbicide application (day) | Standard deviation<br>of use date (day) |
|----------|----------------------------------|---------------------------------------------------------|-----------------------------------------|
| A0       | On the transplanting day         | 2.5                                                     | 7.7                                     |
| A1       | 1 to 5 days after transplanting  | 6.8                                                     | 5.2                                     |
| A2       | 7 to 20 days after transplanting | 30.4                                                    | 17.1                                    |



Table S6 Comparison of RMSEs<sup>a</sup> and RMSLEs<sup>b</sup> among target herbicides.

| Name                 | RMSE | RMSLE |
|----------------------|------|-------|
| Azimsulfuron         | 114  | 7.10  |
| Bensulfuron methyl   | 146  | 1.49  |
| Bentazon             | 182  | 2.72  |
| Benzobicyclon        | 151  | 0.97  |
| Benzofenap           | 145  | 0.57  |
| Bromobutide          | 171  | 1.42  |
| Butachlor            | 255  | 1.50  |
| Butamifos            | 220  | 9.03  |
| Cafenstrole          | 166  | 1.86  |
| Clomeprop            | 182  | 2.55  |
| Cumyluron            | 202  | 1.00  |
| Cyclosulfamuron      | 301  | 3.04  |
| Daimuron             | 192  | 1.50  |
| Dimethametryn        | 108  | 1.79  |
| Esprocarb            | 399  | 1.16  |
| Halosulfuron methyl  | 174  | 5.39  |
| Imazosulfuron        | 145  | 1.62  |
| MCPA                 | 248  | 1.59  |
| Mefenacet            | 179  | 2.02  |
| Oxaziclomefone       | 160  | 5.58  |
| Pretilachlor         | 194  | 1.39  |
| Pyrazolate           | 947  | 1.12  |
| Pyrazosulfuron ethyl | 143  | 3.17  |
| Pyriftalid           | 170  | 1.30  |
| Simetryn             | 202  | 1.39  |

a) Root mean square error. b) Root mean square logarithmic error.

Table S7 Summary of the field survey results at each site.

| River name | Number of samples | Number of different herbicides detected | Total number of herbicides detected <sup>a)</sup> | Site detection ratio <sup>b)</sup> | Highest concentration herbicide | Highest detected concentration ( $\mu\text{g L}^{-1}$ ) |
|------------|-------------------|-----------------------------------------|---------------------------------------------------|------------------------------------|---------------------------------|---------------------------------------------------------|
| Yoshida    | 7                 | 24                                      | 116                                               | 0.66                               | bromobutide                     | 12                                                      |
| Usui       | 8                 | 21                                      | 74                                                | 0.37                               | bromobutide                     | 0.70                                                    |
| Kokai      | 8                 | 25                                      | 148                                               | 0.74                               | bentazon                        | 11                                                      |
| Koise      | 13                | 25                                      | 252                                               | 0.78                               | bromobutide                     | 13                                                      |
| Hanamuro   | 32                | 24                                      | 693                                               | 0.87                               | bromobutide                     | 14                                                      |
| Asahina    | 6                 | 25                                      | 101                                               | 0.67                               | bromobutide                     | 17                                                      |
| Koutsuki   | 5                 | 22                                      | 66                                                | 0.53                               | mefenacet                       | 3.6                                                     |

a) Determined by summing the number of herbicides detected in the samples collected at the site.

b) The ratio of the total number of detected herbicides to the product of the number of samples and the total number of target herbicides (25).

Table S8 Recovery rates for the target herbicides.

| Name                 | Recovery rate (%) |
|----------------------|-------------------|
| Azimsulfuron         | 106.9             |
| Bensulfuron methyl   | 106.4             |
| Bentazon             | 234.1             |
| Benzobicyclon        | 99.2              |
| Benzofenap           | 92.2              |
| Bromobutide          | 112.7             |
| Butachlor            | 80.4              |
| Butamifos            | 78.5              |
| Cafenstrole          | 95.8              |
| Clomeprop            | 95.4              |
| Cumyluron            | 94.6              |
| Cyclosulfamuron      | 103.8             |
| Daimuron             | 100.8             |
| Dimethametryn        | 89.7              |
| Esprocarb            | 47.7              |
| Halosulfuron methyl  | 102.9             |
| Imazosulfuron        | 101.4             |
| MCPA                 | 90.7              |
| Mefenacet            | 94.1              |
| Oxaziclomefone       | 89.5              |
| Pretilachlor         | 85.7              |
| Pyrazolate           | 92.9              |
| Pyrazosulfuron ethyl | 107.2             |
| Pyriftalid           | 95.7              |
| Simetryn             | 113.7             |

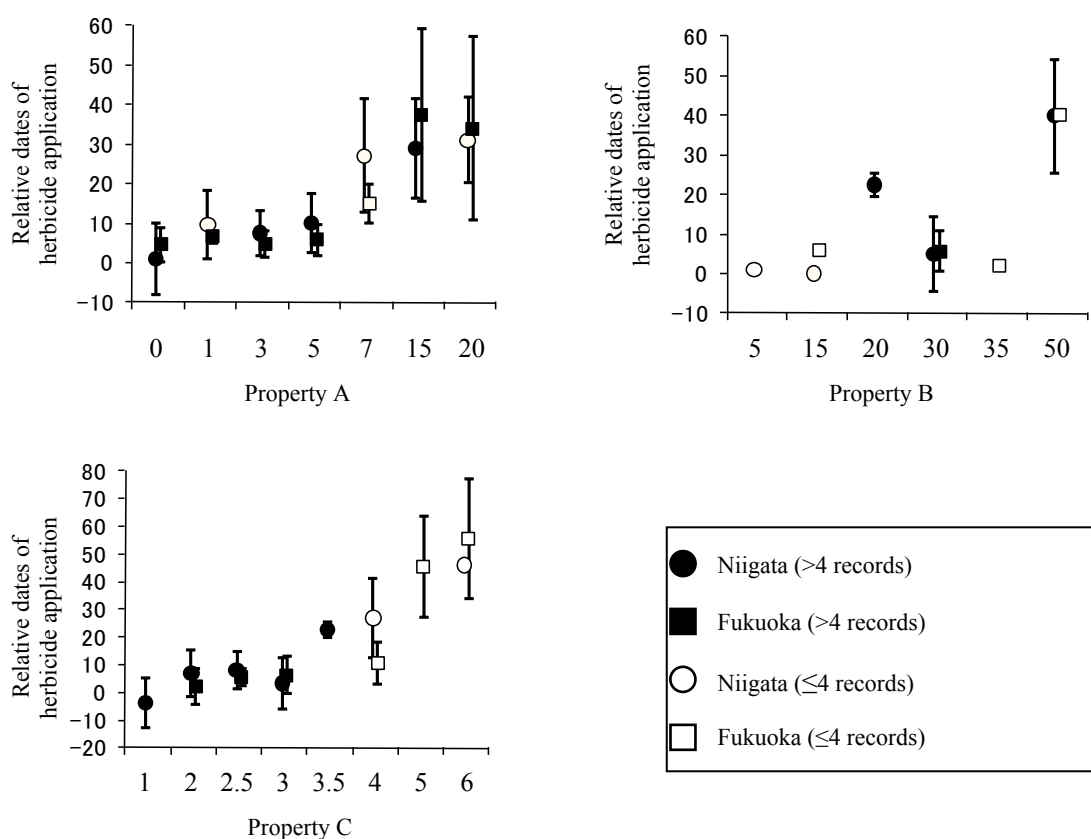

Fig. S1 Comparisons of dates of herbicide application relative to the transplanting date with values of Property A (first day of the suggested usage period after transplanting), B (last day of the suggested usage period after transplanting), and C (highest leaf-growth stage of barnyard grass in the suggested usage period). Symbols indicate average values, and error bars indicate standard deviations.

## References

- 1 Inao, K., Development and Validation of Simulation Model for Predicting Pesticide Behavior in Paddy Rice Environment (in Japanese). Bulletin of the National Institute of Agro-Environmental Sciences 2004, 23, 27-76. <http://agriknowledge.affrc.go.jp/RN/2010691306.pdf>
- 2 Maru, S., Outflow of Pesticides from a Paddy Lysimeter as Affected by the Water Solubility (in Japanese). Journal of Pesticide Science 1990, 15 (3), 385-394.
- 3 Maru, S., Monitoring Survey of Pesticides in River Water within Chiba Prefecture (in Japanese). Ecological Chemistry 1985, 8 (3), 3-11.
- 4 Japan Plant Protection Association, "Noyaku Handobukku" (Agricultural Chemical Handbook) 2005 (in Japanese), Japan Plant Protection Association, Tokyo, 2005.
- 5 C. D. S. Tomlin, *The E-pesticide Manual: A World Compendium, Version 4.2*, British Crop Protection Council, Hampshire, 2009.
- 6 The Food Safety Commission of Japan, Risk Assessment Reports of Pesticides (in Japanese), <http://www.fsc.go.jp/senmon/nouyaku/index.html>, (accessed 6 January 2011).

- 7 J. Kanazawa, "*Noyaku no Kankyotokusei to Dokuseidetashu*" (*Data on environmental property and toxicity of pesticide*) (*in Japanese*), Godo Publishers, Tokyo, 1996.
- 8 N. Suzuki, K. Murasawa, K. Nansai, T. Sakurai, Y. Moriguchi, K. Tanabe, O. Nagasugi and M. Morita, River networking database for geo-referenced fate modeling of Japanese river, Research Report from the National Institute for Environmental Studies, Japan, R-179(CD)-2003, 2003.
